# Supplementary material
Source: MDPI journal article supplement (https://www.mdpi.com/2078-2489/10/6/187)
Supplement: s1 [file s1]

**Table S1.** Description of the final feature subset using IGSFS-CD (Subset evaluation with Decision Tree) for two datasets.

| LC_dataset-1      |                                                                                                                                                                                                                                                                                                                                     | LC_dataset II     |                                                                                                                                                                                                                                                            |
|-------------------|-------------------------------------------------------------------------------------------------------------------------------------------------------------------------------------------------------------------------------------------------------------------------------------------------------------------------------------|-------------------|------------------------------------------------------------------------------------------------------------------------------------------------------------------------------------------------------------------------------------------------------------|
| Selected features | Descriptions                                                                                                                                                                                                                                                                                                                        | Selected features | Descriptions                                                                                                                                                                                                                                               |
| 1. AGE            | Age range according to hospital code by classified into 16 age groups.                                                                                                                                                                                                                                                              | 1. AGE            | Age range according to hospital code by classified into 16 age groups.                                                                                                                                                                                     |
| 2. EXT            | Extent of metastasis<br>1=In situ 2=Localized 3=Direct extension 4=Regional lymph nodes 5=Distant metastases 8=Not applicable 9= Unknown                                                                                                                                                                                            | 2. EXT            | Extent of metastasis<br>1=In situ 2=Localized 3=Direct extension 4=Regional lymph nodes 5=Distant metastases 8=Not applicable 9= Unknown                                                                                                                   |
| 3. BASIC          | Diagnostic methods<br>0=Death Certificate Only<br>1=History & Physical exam<br>2= Endoscopy & Radiology<br>3= Surgery & Autopsy<br>4= Specific Biochem/Immuno tests<br>5= Cytology or Hematology<br>6= Histology of Metastasis<br>7= Histology of Primary                                                                           | 3. SURG           | Surgical treatment<br>1=yes 2=No 3= Unknown                                                                                                                                                                                                                |
| 4. BC006          | Cholesterol is a compound of the sterol type found in most body tissues. A blood test for cholesterol measures total cholesterol that is carried in the blood by lipoproteins. 1= Normal (0-200 mg/dl) 3= (>200 mg/dl) 9= Unknown                                                                                                   | 4. IM011          | Carbohydrate antigen (CA 19-9) is a protein commonly found on the surface of cancer cells. It is useful as a tumor marker to follow the response to cancer treatment, particularly in pancreatic cancer.<br>1= Normal (0-39 U/ml) 3= (>39 U/ml) 9= Unknown |
| 5. BC009          | Triglycerides are chemical compounds and the most common form of fat in the body. Each triglyceride molecule contains a glyceride that is bound to three molecules of free fatty acids, called glycerol. The triglyceride test measures the level of triglycerides in the blood. 1= Normal (0-150 mg/dl) 3= (>150 mg/dl) 9= Unknown | 5. 60_list        | Cognition and Perception of pain by Gordon's functional health patterns<br>1=yes 2=No 9= Unknown                                                                                                                                                           |
| 6. T              | Primary tumor (T)                                                                                                                                                                                                                                                                                                                   | 6. T              | Primary tumor (T)                                                                                                                                                                                                                                          |
| 7. M              | Distant metastasis (M)                                                                                                                                                                                                                                                                                                              |                   |                                                                                                                                                                                                                                                            |

**Table S2.** Description of the final feature subset using IGSFS-CD (Subset evaluation with Naïve Bayes) for two datasets.

| LC_dataset-1      |                                                                                                                                                                                                             | LC_dataset II     |                                                                                                                                                                                                                                                       |
|-------------------|-------------------------------------------------------------------------------------------------------------------------------------------------------------------------------------------------------------|-------------------|-------------------------------------------------------------------------------------------------------------------------------------------------------------------------------------------------------------------------------------------------------|
| Selected features | Descriptions                                                                                                                                                                                                | Selected features | Descriptions                                                                                                                                                                                                                                          |
| 1. MOR            | The morphology of the biopsy<br>8000 = Neoplasm, malignant<br>8010 = Carcinoma, NOS<br>8140 = Adenocarcinoma, NOS<br>8170 = Hepatocellular Carcinoma, NOS<br>8500 = Infiltrating duct carcinoma, NOS        | 1. BASIC          | Diagnostic methods<br>0 = Death Certificate Only, 1 = History & Physical exam, 2 = Endoscopy & radiology, 3 = Surgery & Autopsy, 4 = Specific Biochem/Immuno tests, 5 = Cytology or Hematology, 6 = Histology of Metastasis, 7 = Histology of Primary |
| 2. LATER          | Laterality of tumor site such as right side or left side 0=Not a paired site 1 = Right: primary, 2 = Left: primary 3= One side, right or left unspecified, 4 = Bilateral, 9 = Pair site, laterality unknown | 2. LATER          | Laterality of tumor site such as right side or left side 0 = Not a paired site 1 = Right: primary, 2 = Left: primary, 3= One side, right or left unspecified, 4 = Bilateral, 9 = Pair site, laterality unknown                                        |
| 3. GRAD           | Tumor Grade of the biopsy<br>1 =Well differentiated, 2 = Moderately differ'd, 3 = Poorly differ'd, 4 = Undifferentiated, 6 = Positive B-cell, 9 = Unknown                                                   | 3. MET            | Place of metastasis 0 = None, 1 = Lymph node, 2 = Bone, 3 = Liver, 4 = Lung / Pleura, 5 = Brain, 6 = Peritoneum, 7 = Multiple sites, 8 = Other, 9 = Unknown                                                                                           |
| 4. EXT            | Extent of metastasis<br>1 = In situ, 2=Localized, 3=Direct extension, 4=Regional lymph nodes, 5=Distant metastases, 8=Not applicable, 9= Unknown                                                            | 4. EXT            | Extent of metastasis<br>1 = In situ, 2 = Localized, 3=Direct extension, 4 = Regional lymph nodes, 5 = Distant metastases, 8 = Not applicable, 9 = Unknown                                                                                             |
| 5. T              | Primary tumor (T)                                                                                                                                                                                           | 5. T              | Primary tumor (T)                                                                                                                                                                                                                                     |
| 6. PDX2           | ICD-10-CM Code of Principal Diagnosis such as C22.0 = Liver cell carcinoma, C22.2 = Hepatoblastoma, K76.9= Liver disease                                                                                    | 6. PDX2           | ICD-10-CM Code of Principal Diagnosis such as C22.0 = Liver cell carcinoma, C22.2 = Hepatoblastoma, K76.9= Liver disease                                                                                                                              |
| 7. SDX6           | ICD-10-CM Code of Secondary Diagnosis such as Z51.1=Chemotherapy session for neoplasm, K76.8= Other specified diseases of liver                                                                             | 7. SDX3           | ICD-10-CM Code of Secondary Diagnosis such as Z51.1= Chemotherapy session for neoplasm                                                                                                                                                                |

Table S2 Cont.

| LC_dataset-1      |                                                                                                                                                                                                                                                                                                                                                                           | LC_dataset II     |                                                                                                                                                                                                                                                                                                                                           |
|-------------------|---------------------------------------------------------------------------------------------------------------------------------------------------------------------------------------------------------------------------------------------------------------------------------------------------------------------------------------------------------------------------|-------------------|-------------------------------------------------------------------------------------------------------------------------------------------------------------------------------------------------------------------------------------------------------------------------------------------------------------------------------------------|
| Selected features | Descriptions                                                                                                                                                                                                                                                                                                                                                              | Selected features | Descriptions                                                                                                                                                                                                                                                                                                                              |
| 8. SDX9           | ICD-10-CM Code of Secondary Diagnosis                                                                                                                                                                                                                                                                                                                                     | 8. CHEM           | Chemical treatment<br>1 = yes, 2 = No, 3 = Unknown                                                                                                                                                                                                                                                                                        |
| 9. PROC1          | ICD-9-CM Code of Procedure such as 50.3 = Lobectomy of liver<br>99.25 = Injection or infusion of cancer chemotherapeutic substance                                                                                                                                                                                                                                        | 9. RADI           | Radiation therapy 1 = yes, 2 = No, 3 = Unknown                                                                                                                                                                                                                                                                                            |
| 10. PROC2         | ICD-9-CM Code of Procedure                                                                                                                                                                                                                                                                                                                                                | 10.N              | Regional lymph nodes (N)                                                                                                                                                                                                                                                                                                                  |
| 11. BC005         | Uric acid is produced by the breakdown of purines in cells of the body. In term of cancer treatment, a blood test for uric acid is useful to monitor uric acid levels when undergoing chemotherapy or radiation treatment. 1 = Normal (Male 2.4-5.7 mg/dl, Female 3.4-7.0 mg/dl) 2 = (Male <2.4 mg/dl, Female <3.4 mg/dl), 3 = (Male >5.7 mg/dl, Female >7.0) 9 = Unknown | 11.BC009          | Triglycerides are chemical compounds and the most common form of fat in the body. Each triglyceride molecule contains a glyceride that is bound to three molecules of free fatty acids, called glycerol. The triglyceride test measures the level of triglycerides in the blood.<br>1= Normal (0-150 mg/dl) 3= (>150 mg/dl)<br>9= Unknown |
| 12. BC006         | Cholesterol is a compound of the sterol type found in most body tissues. A blood test for cholesterol measures total cholesterol that is carried in the blood by lipoproteins.<br>1 = Normal (0-200 mg/dl), 3 = (>200 mg/dl), 9 = Unknown                                                                                                                                 | 12.BC015          | It is known as serum glutamic-oxaloacetic transaminase (SGOT). AST is an enzyme mostly found in the heart and liver. AST test is useful for detecting or monitoring liver damage.<br>1 = Normal (0-32 U/L Female, 0-40 U/L Male), 3 = (>32 U/L Female, >40 U/L Male), 9 = Unknown                                                         |
| 13. IM001         | AFP is a protein produced by the liver when its cells are regenerating. It is normally used as a tumor marker to detect and diagnose cancers of the liver. 1 = Normal (0.0-13.60 ng/ml), 3 = (>13.60 ng/ml), 9 = Unknown                                                                                                                                                  | 13. IM008         | It is an indicator of the amount of cancer, size of tumor, and cancer staging. CEA is primarily used to monitor cancer treatment, including response to therapy and recurrence. 1= Normal (0-5 ng/ml), 3 = (>5 ng/ml) 9 = Unknown                                                                                                         |

Table S2 Cont.

| LC_dataset-1      |                                                                                                                                                                                                                                     | LC_dataset II     |                                                                                                                                                                                  |
|-------------------|-------------------------------------------------------------------------------------------------------------------------------------------------------------------------------------------------------------------------------------|-------------------|----------------------------------------------------------------------------------------------------------------------------------------------------------------------------------|
| Selected features | Descriptions                                                                                                                                                                                                                        | Selected features | Descriptions                                                                                                                                                                     |
| 14. IM008         | It is an indicator of the amount of cancer, size of tumor, and cancer staging. CEA is primarily used to monitor cancer treatment, including response to therapy and recurrence. 1 = Normal (0-5 ng/ml), 3 = (>5 ng/ml), 9 = Unknown | 14. 57_list       | Cognition and perception of visibility by Gordon's functional health patterns.<br>1 = Normal vision, 2 = Shortsighted, 3 = Longsighted, 4 = Wear glasses, 5 = Other, 9 = Unknown |
